# Supplementary material
Source: PubMed Central journal article supplement (PMC5939638)
Supplement: en.2018-00004.st1.pdf [file en.2018-00004.st1.pdf]

**Supplementary Table 1.** Clinical characteristics of human heart tissue donors

| Sample | Patient ID | Tissue Source | CHF Etiology | Age (years) | Weight (kg) | BMI (kg/m <sup>2</sup> ) | HW (g) | LV Mass (g) | HW Index | Afib | VT/VF | Diabetes | Hypertension | LVEF | Creatinine (mg/dl) |
|--------|------------|---------------|--------------|-------------|-------------|--------------------------|--------|-------------|----------|------|-------|----------|--------------|------|--------------------|
| 1      | P01262     | C             | ID-CMP       | 42          | 115         | 35.5                     | 528    | N/A         | 220      | Y    | N     | N        | N            | 0.15 | 1                  |
| 2      | P01275     | C             | ID-CMP       | 62          | 83          | 24.8                     | 662    | N/A         | 315      | Y    | N     | N        | N            | 0.1  | 1.25               |
| 3      | P01290     | C             | ID-CMP       | 65          | 68          | 21                       | 624    | 433         | 347      | N    | N     | N        | N            | 0.1  | 1.27               |
| 4      | P01358     | C             | ID-CMP       | 42          | 89          | 23.4                     | 744    | 392         | 338      | Y    | Y     | Y        | Y            | 0.1  | 1.1                |
| 5      | P01362     | NF            | NF           | 51          | 91          | 30.4                     | 286    | 156         | 136      | U    | U     | Y        | U            | 0.55 | 0.8                |
| 6      | P01365     | NF            | NF           | 69          | 67          | 20                       | 377    | 176         | 209      | N    | N     | N        | Y            | U    | 1.08               |
| 7      | P01371     | C             | ID-CMP       | 54          | 60          | 20                       | 434    | 244         | 255      | N    | Y     | N        | N            | 0.15 | 1.29               |
| 8      | P01377     | NF            | NF           | 77          | 78          | 27                       | 495    | 181         | 261      | Y    | N     | N        | Y            | U    | 0.8                |
| 9      | P01383     | NF            | NF           | 59          | 132         | 43.1                     | 498    | 234         | 199      | N    | N     | Y        | Y            | 0.6  | 0.88               |
| 10     | P01388     | NF            | NF           | 51          | 121         | 36.1                     | 516    | 265         | 206      | N    | N     | N        | N            | 0.55 | 1.5                |
| 11     | P01430     | C             | ID-CMP       | 62          | 86          | 22.6                     | 730    | 395         | 332      | Y    | N     | N        | N            | 0.12 | 1.08               |
| 12     | P01485     | NF            | NF           | 78          | 92          | 29.9                     | 448    | 234         | 213      | N    | N     | N        | Y            | U    | U                  |
| 13     | P01488     | NF            | NF           | 81          | 78          | 27                       | 402    | 218         | 212      | N    | N     | N        | Y            | U    | 1.6                |
| 14     | P01504     | C             | ID-CMP       | 49          | 76          | 26.3                     | 424    | 269         | 223      | N    | N     | Y        | Y            | 0.18 | 0.69               |
| 15     | P01584     | NF            | NF           | 22          | 67          | 20.7                     | 299    | 182         | 166      | N    | N     | N        | N            | 0.55 | 1                  |

All cardiac tissue samples are from male, Caucasian patients. Afib, atrial fibrillation; BMI, body mass index; C, cardiomyopathy; CHF, chronic heart failure; HW; heart weight; ID-CMP, idiopathic cardiomyopathy; LV, left ventricle; LVEF, left ventricular ejection fraction; N, no; NF, non-failing; VT/VF, ventricular tachycardia/ventricular fibrillation; U, unknown; Y, yes. Modified from Ussher, JR et al Reference 26
