# Supplementary material
Source: PubMed Central journal article supplement (PMC5939638)
Supplement: en.2018-00004.st2.pdf [file en.2018-00004.st2.pdf]

**Supplementary Table 2.** University Health Network Rapid Autopsy Program: Human heart samples

| <b>Case #</b> | <b>Tissue Site</b>                                           | <b>Procedure</b> |
|---------------|--------------------------------------------------------------|------------------|
| 52411         | Cardiac ventricle, right and septum                          | Autopsy          |
| 61704         | Cardiac ventricle, right                                     | Autopsy          |
| 69184         | Cardiac ventricle, right                                     | Autopsy          |
| 70150         | Cardiac ventricle, right                                     | Autopsy          |
| 70847         | Coronary artery                                              | Autopsy          |
| 73434         | Cardiac ventricle, right                                     | Autopsy          |
| 75924         | Cardiac ventricle, left                                      | Autopsy          |
| 76623         | Cardiac ventricle, left                                      | Autopsy          |
| 77566 N       | Cardiac ventricle, left                                      | Autopsy          |
| 81342         | Cardiac ventricle, left                                      | Autopsy          |
| 81346         | Cardiac ventricle, left                                      | Autopsy          |
| 81858         | Cardiac ventricle, left                                      | Autopsy          |
| 81862         | Cardiac ventricle, left                                      | Autopsy          |
| 82711         | Cardiac ventricle, left and right                            | Autopsy          |
| 84855         | Cardiac ventricle, left with vessels                         | Autopsy          |
| 116603        | Left and right septum                                        | Autopsy          |
| 137710        | Cardiac ventricle, left with leukemic infiltrate             | Autopsy          |
| 159096        | Cardiac ventricle, left                                      | Autopsy          |
| 166469        | Cardiac ventricle, left with epicardial fat                  | Autopsy          |
| 179268        | Cardiac ventricle, left                                      | Autopsy          |
| 179338        | Cardiac ventricle, left with lymphoma                        | Autopsy          |
| 193847        | Cardiac ventricle, right and coronary artery                 | Autopsy          |
| 193856        | Cardiac ventricle, left with small coronary arteries         | Autopsy          |
| 152781 N      | Cardiac ventricle, left                                      | Autopsy          |
| 164007 N      | Cardiac ventricle, right                                     | Autopsy          |
| 164011 N      | Cardiac ventricle, left with epicardial vessels              | Autopsy          |
| 171263 N      | Cardiac ventricle, right with inflammation                   | Autopsy          |
| 171267 N      | Cardiac ventricle, left and septum                           | Autopsy          |
| 176225 N      | Cardiac ventricle, right with small vessels and fat          | Autopsy          |
| 180806 A      | Heart                                                        | Autopsy          |
| 180820 N      | Cardiac ventricle, left                                      | Autopsy          |
| 180827 N      | Cardiac ventricle, right                                     | Autopsy          |
| 182647 N      | Cardiac ventricle, left with infarct scar and small arteries | Autopsy          |
| 182651 N      | Heart                                                        | Autopsy          |
| 212080 N      | Cardiac ventricle, left with small amount of tumour          | Autopsy          |
