# Supplementary material
Source: PubMed Central journal article supplement (PMC5939638)
Supplement: en.2018-00004.st3.pdf [file en.2018-00004.st3.pdf]

**Supplemental Table 3.** Alberta Diabetes Institute Islet Core-supplied human islet donor information

| <b>Donor #</b> | <b>Age (years)</b> | <b>Gender</b> | <b>BMI</b> | <b>HbA1c</b> |
|----------------|--------------------|---------------|------------|--------------|
| R167           | 84                 | female        | 21.10      | NA           |
| R177           | 28                 | male          | 23.39      | NA           |
| R186           | 67                 | male          | 28.06      | 5.6          |
| R199           | 56                 | male          | 18.32      | 5.3          |
| R200           | 65                 | male          | 27.13      | 5.1          |

BMI, body mass index; HbA1c, hemoglobin A1c.
