# Supplementary material
Source: PubMed Central journal article supplement (PMC5939638)
Supplement: en.2018-00004.st4.pdf [file en.2018-00004.st4.pdf]

**Supplementary Table 4. qPCR Primers for TaqMan gene expression**

| <b>Gene</b>           | <b>Description</b>                                                      | <b>Assay ID</b> |
|-----------------------|-------------------------------------------------------------------------|-----------------|
| <b>ACTB</b>           | Beta actin                                                              | Hs99999903_m1   |
| <b>GLP1R Exon 3-4</b> | Glucagon-like peptide-1 receptor                                        | Hs00157705_m1   |
| <b>GLP2R</b>          | Glucagon-like peptide-2 receptor                                        | Hs00173688_m1   |
| <b>GIPR</b>           | Gastric inhibitory polypeptide receptor                                 | Hs00609210_m1   |
| <b>GCGR</b>           | Glucagon receptor                                                       | Hs00164710_m1   |
| <b>INSR</b>           | Insulin receptor                                                        | Hs00961560_m1   |
| <b>GPI</b>            | Glucose-6-phosphate isomerase                                           | Hs 00976715_m1  |
| <b>DPP4</b>           | Dipeptidyl Peptidase 4                                                  | Hs00897391_m1   |
| <b>HCN4</b>           | Hyperpolarization activated cyclic nucleotide gated potassium channel 4 | Hs00975492_m1   |
| <b>NPPA</b>           | Natriuretic peptide A                                                   | Hs00383230_g1   |
| <b>MYL7</b>           | Myosin light chain 7                                                    | Hs01085598_g1   |
| <b>ADCY6</b>          | Adenylate cyclase 6                                                     | Hs00209600_m1   |
| <b>ADCY5</b>          | Adenylate cyclase 5                                                     | Hs00766287_m1   |
| <b>MAPK3</b>          | Mitogen-activated protein kinase 3                                      | Hs00385075_m1   |
| <b>CREB1</b>          | cAMP response element binding protein 1                                 | Hs00231713_m1   |
| <b>CHMP2A</b>         | Charged multivesicular body protein 2A                                  | Hs00205423_m1   |
| <b>EMC7</b>           | ER membrane protein complex subunit 7                                   | Hs00220077_m1   |
| <b>PSMB4</b>          | Proteasome subunit, beta type 4                                         | Hs00160598_m1   |
| <b>VIM</b>            | Vimentin                                                                | Hs00958111_m1   |
| <b>ICAM1</b>          | Intercellular adhesion molecule 1                                       | Hs00164932_m1   |
| <b>TEK (Tie2)</b>     | TEK receptor tyrosine kinase                                            | Hs00945150_m1   |
| <b>TAGLN</b>          | Transgellin                                                             | Hs01038777_g1   |
| <b>SMTN</b>           | Smoothelin                                                              | Hs01022255_g1   |
| <b>PTPRC (CD45)</b>   | Protein tyrosine phosphatase, receptor type C                           | Hs04189704_m1   |
| <b>THY1 (CD90)</b>    | Thy-1 cell surface antigen                                              | Hs00174816_m1   |
| <b>ENG (CD105)</b>    | Endoglin                                                                | Hs00923996_m1   |

All primers are from Thermo-Fisher Scientific.
