# Supplementary material
Source: PubMed Central journal article supplement (PMC5939638)

# Supplementary Figure 1

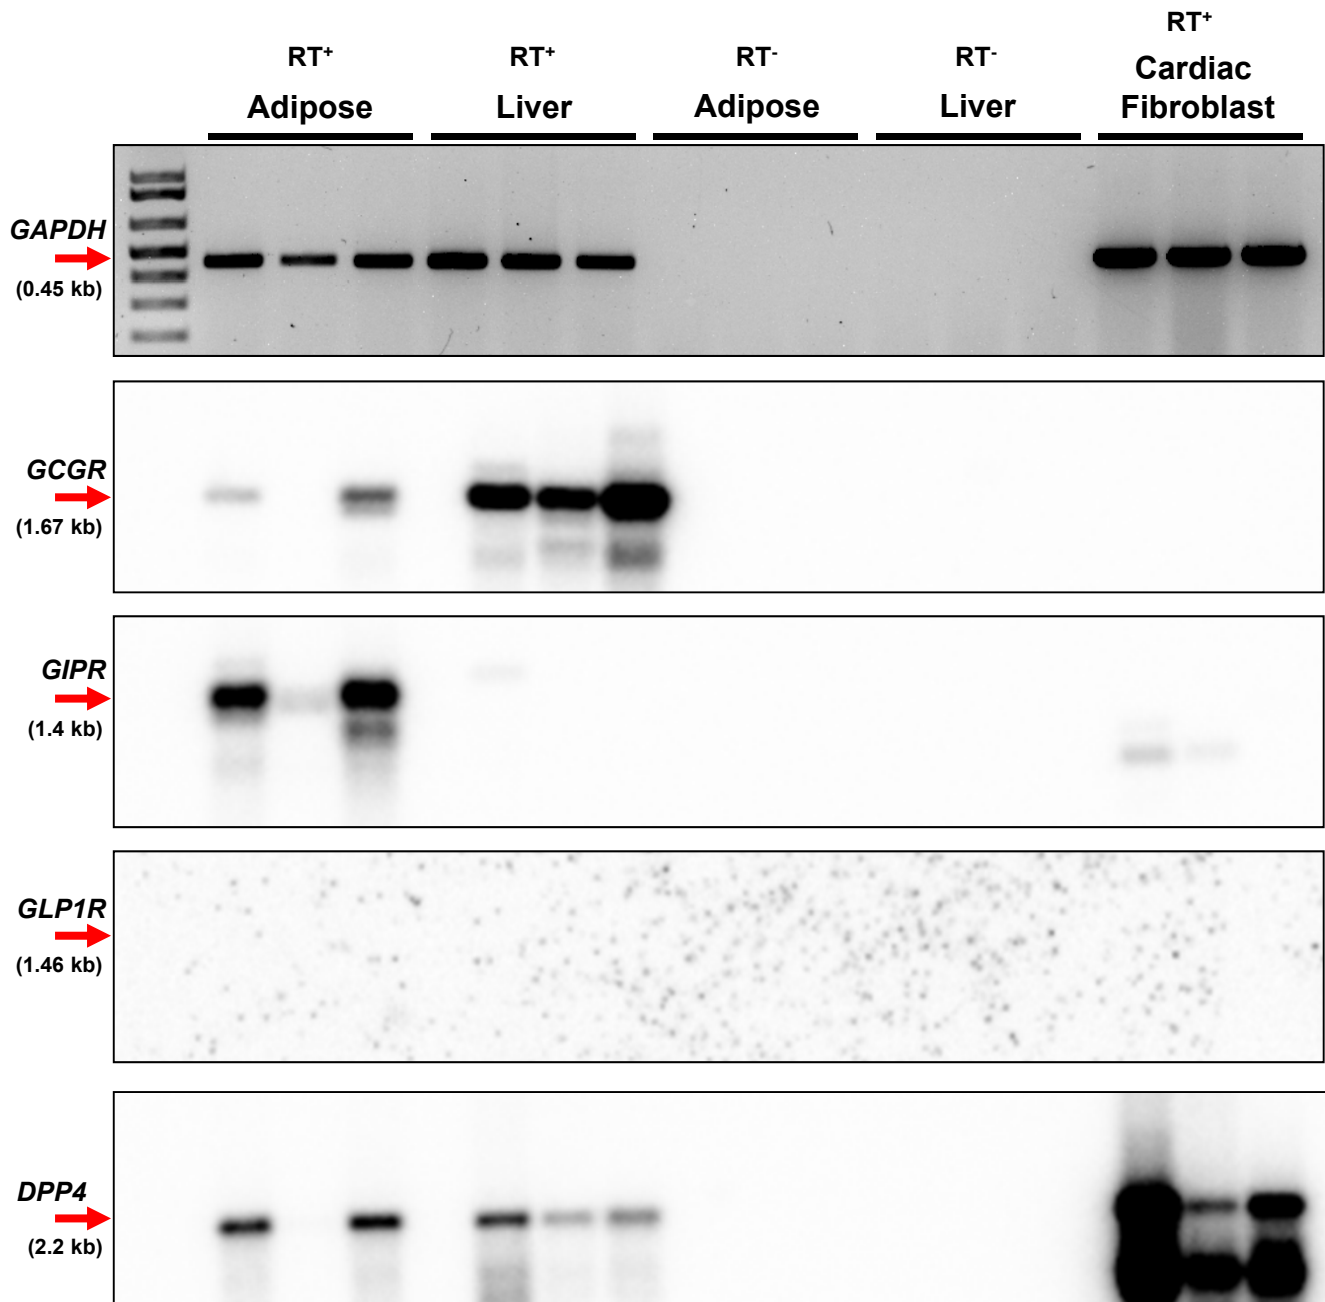

Supplement: en.2018-00004.sf1.pdf [file en.2018-00004.sf1.pdf]
